# Supplementary material for: High-temperature electron transfer coupled spin transition (ETCST) with hysteresis in a discrete [Fe2Co2] Prussian blue analogue
Source: Royal Society of Chemistry journal article supplement (doi:10.1039/d1cc01160j), 2021-01-01
Supplement: d1cc01160j1.pdf [file d1cc01160j1.pdf]

# High-temperature Electron Transfer Coupled Spin Transition (ETCST) with Hysteresis in a Discrete [Fe<sub>2</sub>Co<sub>2</sub>] Prussian Blue Analogue

Jyoti Yadav, Dibya Jyoti Mondal, Sanjit Konar\*

Department of Chemistry, Indian Institute of Science Education and Research Bhopal  
Madhya Pradesh, India 462066

E-mail: [skonar@iiserb.ac.in](mailto:skonar@iiserb.ac.in)

## Table of Contents

|     |                                                       |       |
|-----|-------------------------------------------------------|-------|
| [1] | Experimental Procedures                               | 2-6   |
|     | 1. Materials                                          | 2     |
|     | 2. Synthetic procedures                               | 2-3   |
|     | 3. Physical measurements                              | 4-6   |
| [2] | Results and Discussion                                | 7-30  |
|     | 1. Crystal Structure Determination                    | 7-8   |
|     | 2. Powder X-ray Diffraction measurement               | 9-10  |
|     | 3. Magnetic Measurements                              | 11-12 |
|     | 4. Magnetic Data Fitting                              | 13-16 |
|     | 5. Differential Scanning Calorimetric Study           | 17-19 |
|     | 6. Light Induced Excited Spin State Trapping (LIESST) | 20    |
|     | 7. Thermogravimetric Analysis Study                   | 21-23 |
|     | 8. FT-Infrared Spectroscopy study                     | 24-26 |
|     | 9. Variable Temperature FT-IR Study                   | 27    |
|     | 10. Cyclic Voltammetry Study                          | 28-29 |
|     | 11. UV-Vis Spectroscopic Study                        | 30    |
| [3] | References                                            | 31    |

## Experimental Procedures:

### 1. Materials:

In metal salts, Cobalt (II) perchlorate hexahydrate and Ferric chloride were purchased from Alfa-Aesar and Merck respectively and used as received. All other chemicals Potassium tris(1-Pyrazolyl) borohydride, Benzyl Bromide, Ethylenediamine, 2-Pyridinecarboxaldehyde were persuaded from Sigma- Aldrich. Sodium Cyanide is from Loba Chemie. All solvents used were at least reagent grade. All the reactions were performed in atmospheric air.

**Caution!** Cyanides are very much toxic, therefore, it should be handled with great care and precautions. The unreacted cyanides and the glassware's used for the cyanide reaction was quenched by aqueous solution of  $\text{KMnO}_4$ . Since perchlorates are highly explosive in nature, heating was done carefully, if required.

### 2. Synthetic procedures:

#### 2.1. Synthesis of $\text{Na}[\text{Fe}(\text{Tp})(\text{CN})_3]$ :

The Fe-CN complex was prepared according to earlier procedure reported.<sup>1</sup> Instead of KCN, NaCN was used. IR:  $\nu_{\text{CN}} = 2126 \text{ cm}^{-1}$

#### 2.2. Synthesis of $\{\text{en}(\text{Bn})\text{py}\}$ :

The tetradentate N-donor ligand was prepared using previously reported method.<sup>2</sup> IR ( $\text{cm}^{-1}$ ):  $\nu_{\text{CH}} = 2812(\text{as}), 2796(\text{s}); \nu_{\text{C=N}} = 2355(\text{w}); \nu_{\text{C=C}} = 1590(\text{m}); \nu_{\text{C-N}} = 1239(\text{m})$ .

#### 2.3. Synthesis of $[\text{Fe}(\text{Tp})(\text{CN})_3]_2[\text{Co}\{\text{en}(\text{Bn})\text{py}\}]_2(\text{ClO}_4)_2 \cdot 4\text{MeOH} \cdot 4\text{H}_2\text{O}$ ( $1 \cdot 4\text{MeOH} \cdot 4\text{H}_2\text{O}$ ):

$1 \cdot 4\text{MeOH} \cdot 4\text{H}_2\text{O}$  was prepared by dropwise addition of methanolic solution of in-situ prepared  $[\text{Co}\{\text{en}(\text{Bn})\text{py}\}_2(\text{ClO}_4)_2$  complex to aqueous solution of  $\text{Na}[\text{Fe}(\text{Tp})(\text{CN})_3]$  in 1:1 stoichiometric ratio. Dark green crystals suitable for X-ray diffraction were obtained upon slow evaporation of the filtrate at room temperature.

IR ( $\text{cm}^{-1}$ ):  $\nu_{\text{CN}}(\text{bridged}) = 2087, 2059$  and  $2116 \text{ cm}^{-1}$

**Elemental Analysis:** (Experimental) N = 18.78%, C = 48.75% and H = 4.92%; Calculated: C = 49.07%, H = 5.10% and N = 18.71%.

#### 2.4 Solvent exchange procedure:

The process of solvent exchange was done by redissolving complex-1 in different solvents and further characterized by elemental analysis, Infrared spectroscopy and thermogravimetric analysis.

**a)  $1 \cdot 4\text{H}_2\text{O}$ :** (experimental) N = 19.64%, C = 51.80%, H = 4.36%; Calculated: C = 51.78%, H = 4.35%, N = 19.62%.

**b)  $1 \cdot 2\text{MeCN}$  :** (experimental) N = 20.22%, C = 52.15%, H = 4.50%; Calculated: C = 52.06%, H = 4.47%, N = 20.24%.

c) **1•3EtOH** : (experimental) N = 18.33%, C = 51.88%, H = 5.04%; Calculated: C = 51.80%, H = 4.95%, N = 18.24%.

b) **1•Acetone** : (experimental) N = 19.18%, C = 52.06%, H = 5.62%; Calculated: C = 52.09%, H = 4.53%, N = 19.03%.

b) **1•3DCM** : (experimental) N = 17.32%, C = 47.25%, H = 4.1775%; Calculated: C = 47.23%, H = 4.11%, N = 17.26%.

## 2.5. Desolvated Complexes:

The desolvation process was done by keeping freshly prepared samples at 60°C under high vacuum for about 24 hours. Complete loss of solvents was characterised by elemental analysis and infrared spectroscopy.

a) **1** : Experimental: C = 51.79%, H = 4.36%, N = 19.63%; Calculated: C = 51.78%, H = 4.35%, N = 19.62%.

b) **1'**: Experimental: C = 50.86%, H = 4.06%, N = 19.55%; Calculated: C = 51.78%, H = 4.35%, N = 19.62%.

c) **1''**: Experimental: C = 50.51%, H = 4.27%, N = 19.25%; Calculated: C = 51.78%, H = 4.35%, N = 19.62%.

d) **1<sup>3'</sup>**: Experimental: C = 50.90%, H = 4.27%, N = 19.84%; Calculated: C = 51.78%, H = 4.35%, N = 19.62%.

e) **1<sup>4'</sup>**: Experimental: C = 51.09%, H = 4.26%, N = 19.55%; Calculated: C = 51.78%, H = 4.35%, N = 19.62%.

f) **1<sup>5'</sup>**: Experimental: C = 50.99%, H = 4.26%, N = 19.63%; Calculated: C = 51.78%, H = 4.35%, N = 19.62%.

### 3. Physical measurements:

#### 3.1. Crystal Data Collection and Structure Determination:

Intensity data were collected on a 'Bruker D8-Venture' diffractometer using a graphite monochromated MoK $\alpha$  radiation ( $\lambda = 0.71073$ ) at 140 K. Data collections were performed using  $\phi$  and  $\omega$  scan. Olex2 was used as the graphical interface and the structures were solved with olex2.solve structure solution program using Charge Flipping and refined with the ShelXL refinement package using Least-Squares minimisation. All non-hydrogen atoms were refined anisotropically.

#### 3.2. Powder X-ray Diffraction study:

Powder X-ray diffractometer was carried for the homogeneously crushed crystals of the samples in an AntonPaar in Argon gas flow fitted in a PANalytical X'Pert Pro diffractometer at room temperature with  $2\theta$  ranging from 5 to 50.

#### 3.3. Squid Magnetometry Study:

The magnetic study has been performed using SQUID-VSM magnetometer. All samples were grinded properly before measuring magnetic moment vs. temperature data, to minimize the reorientation of the crystalline particles under applied DC field. All the measurement has been performed with an applied DC field of 1000 Oe from 200-390 K temperature range. The measured values were corrected for the experimentally measured contribution of the sample holder and the derived susceptibilities were corrected for the diamagnetism of the samples, estimated from Pascal's tables.

#### 3.4. Magnetic data fitting:

The magnetic data in all cases were fitted by using Slichter-Drickamer mean-field model by using equation:<sup>3a</sup>

$$\ln \left[ \frac{1 - \gamma_{HS}}{\gamma_{HS} - f_{HS}} \right] = \frac{\Delta H + \Gamma(1 + f_{HS} - 2\gamma_{HS})}{RT} - \frac{\Delta S}{R} \dots \dots \dots (1)$$

Where,  $\gamma_{HS}$  represents the mole fraction of molecules in high spin state;  $f_{HS}$  is residual mole fraction of high spin species which do not show spin transition even at low temperature;  $\Delta H$  and  $\Delta S$  are variation in enthalpy and entropy during spin transition;  $\Gamma$  represents the interaction energy between the molecules (cooperativity);  $R$  is the Universal Gas constant and  $T$  is the temperature. The quantities  $\gamma_{HS}$  and  $f_{HS}$  can be expressed as a function of  $\chi_{MT}$  product which are as follows:

$$\gamma_{HS} = \frac{(\chi_{MT})_m - (\chi_{MT})_{LS}}{(\chi_{MT})_{HS} - (\chi_{MT})_{LS}} \dots \dots \dots (2)$$

$$f_{HS} = \frac{(\chi_{MT})_R - (\chi_{MT})_{LS}}{(\chi_{MT})_{HS} - (\chi_{MT})_{LS}} \dots \dots \dots (3)$$

Here,  $(\chi_{MT})_m$  corresponds  $\chi_{MT}$  value at any certain temperature;  $(\chi_{MT})_R$  is the residual fraction of Fe(III) low spin and Co(II) high spin present at low temperature; and  $(\chi_{MT})_{HS}$  and

$(\chi_{MT})_{LS}$  represents the  $\chi_{MT}$  value at absolutely populated high spin and low spin species of the molecule respectively.

### 3.5. Differential Scanning Calorimetric Study:

The Differential Scanning Calorimetric study was performed on PerkinElmer, Pyris 6 type DSC 6000 instrument. Data collected and baseline correction was done using software version 11.0.0.0449. The data measurement was taken from 250 K to 413 K at a scan rate of 6 K/min.

### 3.6. LIESST measurement:

The LIESST measurement was done by tape-method. The sample (~22.5 mg.) was firstly spread on a [2 cm × 2 cm] tape & placed inside a plastic tube, followed by the green light (532nm.) irradiation for 6 hours at 5 K temp. Under 0.5 T magnetic field until the magnetic moment signal of the sample got Saturated. Afterwards, the sample was scanned from 5K to 400K with the scan rate of 3 K/min (heating mode) & then 400K to 5K with similar scan rate (cooling mode).

### 3.7. Thermogravimetric Analysis:

The Thermogravimetric Analysis was performed on PerkinElmer instrument at a scan rate of 5 K/min.

### 3.8. FT-Infrared Spectroscopy study:

FT-IR spectra were recorded by using a Perkin-Elmer Spectrum BX Spectrometer on KBr pellets with wavenumber ranging between 4000  $\text{cm}^{-1}$  - 400  $\text{cm}^{-1}$ .

### 3.9. Variable Temperature Infrared Spectroscopy:

Variable Temperature FT-IR was recorded with same spectrometer by providing external heat from hot air gun on the KBr pellet of the sample.

### 3.10. Cyclic Voltammetry Study:

The electrochemical study of the sample was measured by using VersaSTAT-3 instrument using software VersaStudio. The study was done by using three-electrode system consisting of glassy carbon as working electrode, Pt wire as a counter electrode and Ag/AgCl electrode as a reference electrode.  $1 \times 10^{-4}$  M concentration of  $\mathbf{1} \cdot 4\text{MeOH} \cdot 4\text{H}_2\text{O}$  and  $2 \times 10^{-4}$  M concentration of its constituent metal complexes ( $\text{Na}[\text{Fe}(\text{Tp})(\text{CN})_3]$  and  $[\text{Co}(\text{L})(\text{Sol})_2]$ ) were used for the data collection and 0.1 M of  $[\text{N}(\text{Bu})_4]\text{BF}_4$  was used as supporting electrolyte in Methanol. The scan range for the sample solutions were from -0.70 to +1.3 V. The scanning cycle was performed by initiating with reduction followed by oxidation. The measurement was performed at a scan rate of 0.05 V/s at room temperature. For  $\mathbf{1} \cdot 4\text{MeOH} \cdot 4\text{H}_2\text{O}$ , measurement was performed at different scan rates (Figure S14b) keeping same concentration of  $1 \times 10^{-4}$  M. All the potentials were measured with respect to Ferrocene/Ferrocenium redox couple.

### **3.11. UV-Visible Spectroscopy:**

The solid as well as solution phase UV-Visible spectroscopic data was collected using Cary 100 instrument using Scan Software Version 4.20(468) scanning between wavelength 300 nm to 1200 nm.

## Results and Discussion:

### 1. Crystal Structure Determination:

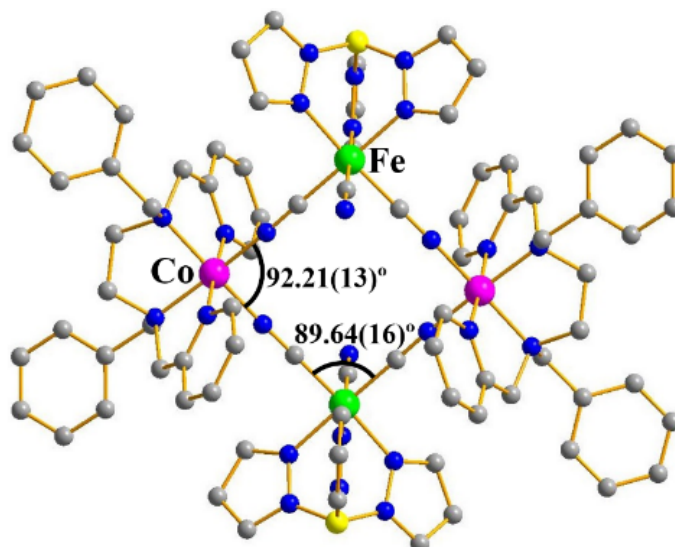

**Figure S1.** Crystal Structure of **1**•4MeOH•4H<sub>2</sub>O. Colour Code: Green: Fe; Pink: Co; Blue: N; Grey: C; Yellow: B. Solvent and anions are omitted for clarity. (CCDC 1983861)

**Table S1.** Crystallographic data:

|                                     |                                                                          |
|-------------------------------------|--------------------------------------------------------------------------|
| Identification code                 | <b>1</b>                                                                 |
| Empirical formula                   | C <sub>42</sub> H <sub>48.97</sub> BClCoFeN <sub>13</sub> O <sub>8</sub> |
| Formula weight                      | 1024.94                                                                  |
| Temperature/K                       | 140.0                                                                    |
| Crystal system                      | monoclinic                                                               |
| Space group                         | P21/c                                                                    |
| a/Å                                 | 13.6224(9)                                                               |
| b/Å                                 | 16.1549(10)                                                              |
| c/Å                                 | 22.4930(16)                                                              |
| α/°                                 | 90                                                                       |
| β/°                                 | 105.752(3)                                                               |
| γ/°                                 | 90                                                                       |
| Volume/Å <sup>3</sup>               | 4764.1(6)                                                                |
| Z                                   | 4                                                                        |
| D <sub>x</sub> , g cm <sup>-3</sup> | 1.429                                                                    |
| R <sub>1</sub> <sup>a</sup>         | 0.0546                                                                   |
| wR <sub>2</sub> <sup>a</sup>        | 0.0993                                                                   |

[a]  $I \geq 2\sigma(I)$ :  $R_1 = \sum ||F_o| - |F_c|| / \sum |F_o|$ ,  $wR_2 = \{\sum [w(F_o - F_c)^2] / \sum [w(F_o)^2]\}^{1/2}$ .

**Table S2. Selected bond lengths at 140 K:**

| Atom | Atom | Length/Å |
|------|------|----------|
| Co1  | N12  | 2.002(3) |
| Co1  | N13  | 1.944(3) |
| Co1  | N10  | 1.941(3) |
| Co1  | N11  | 2.000(3) |
| Co1  | N8   | 1.886(4) |
| Co1  | N7   | 1.884(3) |
| Fe1  | N1   | 2.001(3) |
| Fe1  | N5   | 2.013(3) |
| Fe1  | N3   | 2.007(3) |
| Fe1  | C11  | 1.858(4) |
| Fe1  | C10  | 1.866(5) |
| Fe1  | C12  | 1.901(5) |

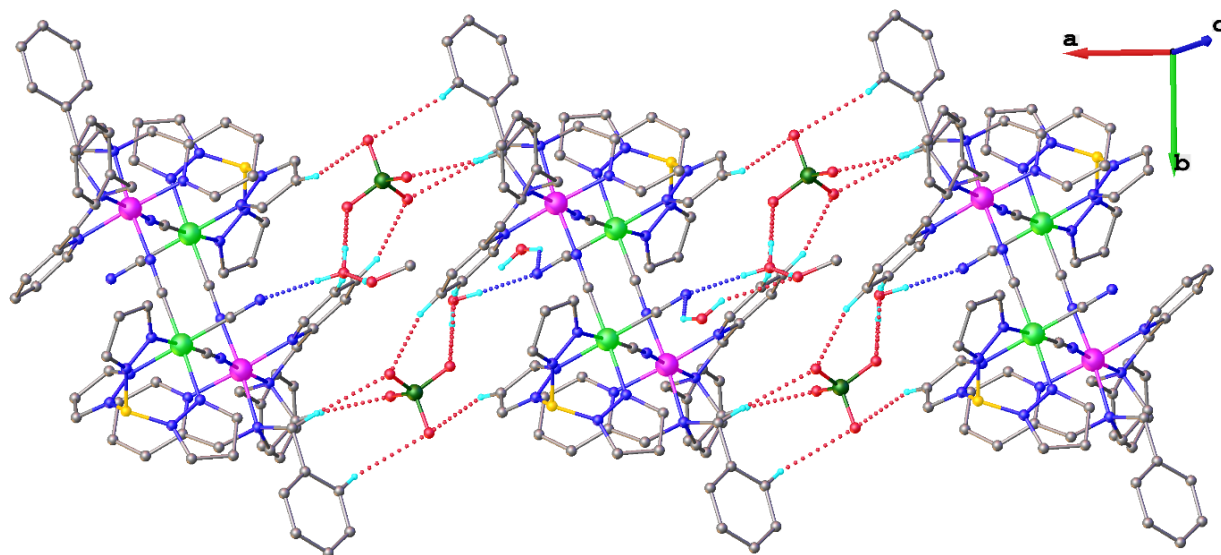

**Figure S2.** Hydrogen bonding interactions between solvent molecules, perchlorate anions and the  $[\text{Fe}_2(\mu\text{-CN})\text{Co}_2]$  square grids. The Hydrogen atoms not involved in Hydrogen bonding and the minor disordered components of the solvent molecules have been omitted for clarity.



## 2. Powder X-ray Diffraction measurement:

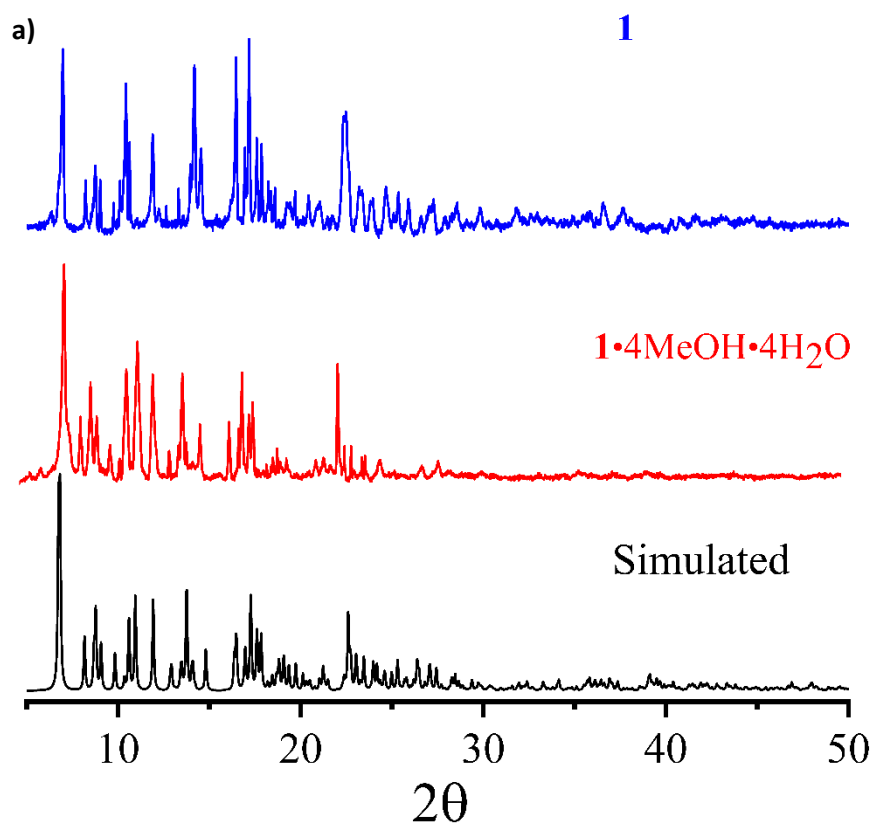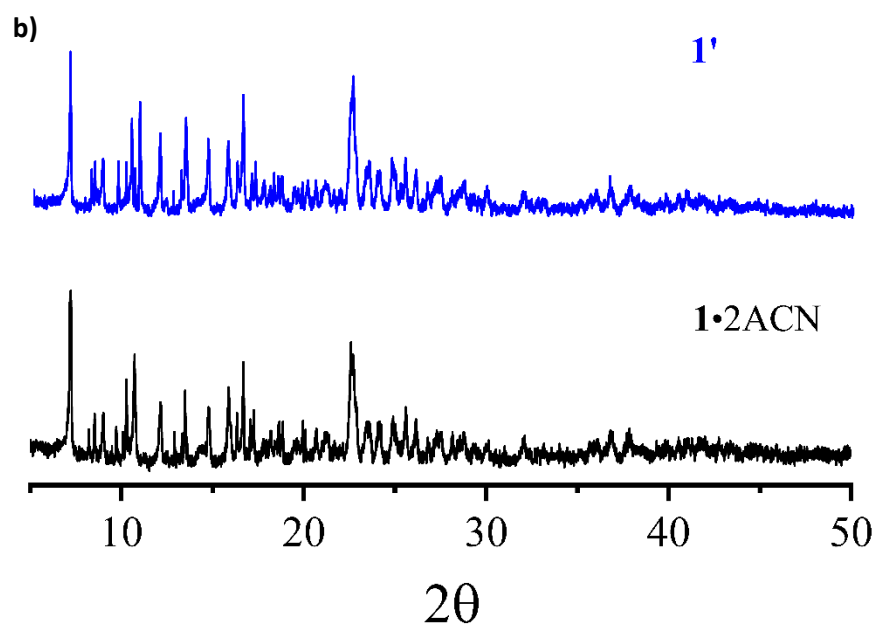

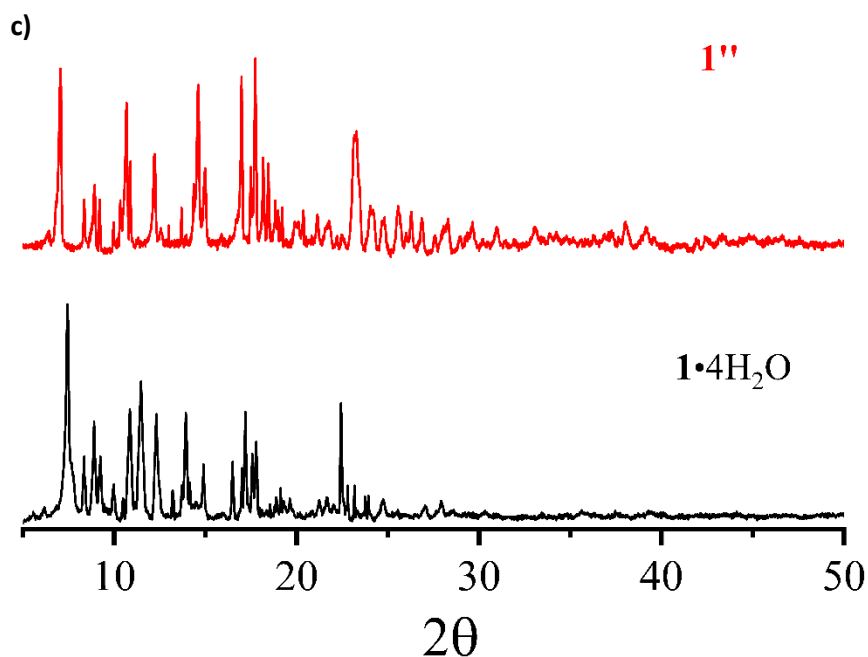

**Figure S3.** P-XRD data for a)  $1\cdot 4\text{MeOH}\cdot 4\text{H}_2\text{O}$  &  $1$ , b)  $1\cdot 2\text{MeCN}$  &  $1'$  and c)  $1\cdot 4\text{H}_2\text{O}$  &  $1''$  between  $2\theta$  ranging from 5 to 50 at room temperature (298 K).

P-XRD patterns for the as synthesized sample, the solvatomorphs and their respective desolvated forms at lower  $2\theta$  range shows similar trend as of the SC-XRD simulated powder data of  $1\cdot 4\text{MeOH}\cdot 4\text{H}_2\text{O}$ . Thus, it is supposed that the structural integrity as well as phase purity of the samples are retained all through the various characterizations and measurements.

### 3. Magnetic Measurements:

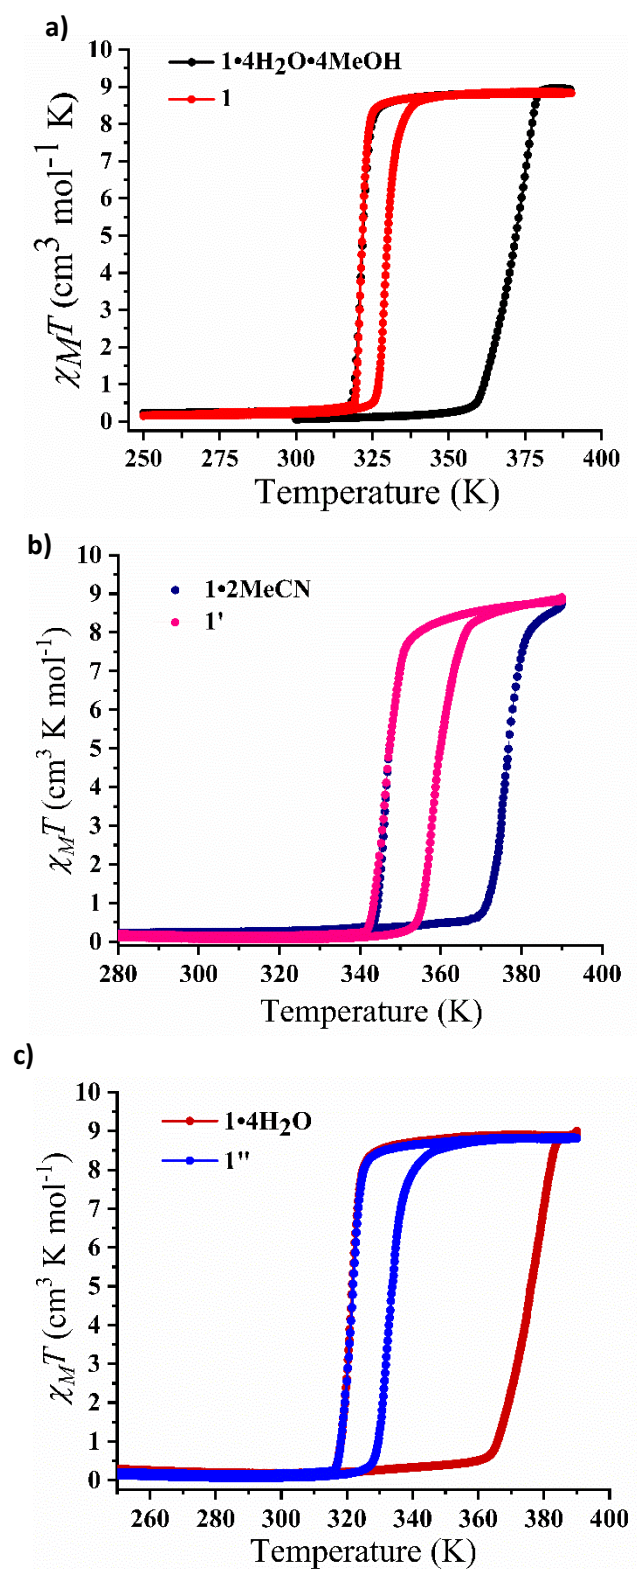

**Figure S4.**  $\chi_M T$  vs T plot for a)  $1 \cdot 4\text{MeOH} \cdot 4\text{H}_2\text{O}$  &  $1$ , b)  $1 \cdot 2\text{MeCN}$  &  $1'$  and c)  $1 \cdot 4\text{H}_2\text{O}$  &  $1''$  between 2 K to 390 K at a scan rate of 6 K/min.

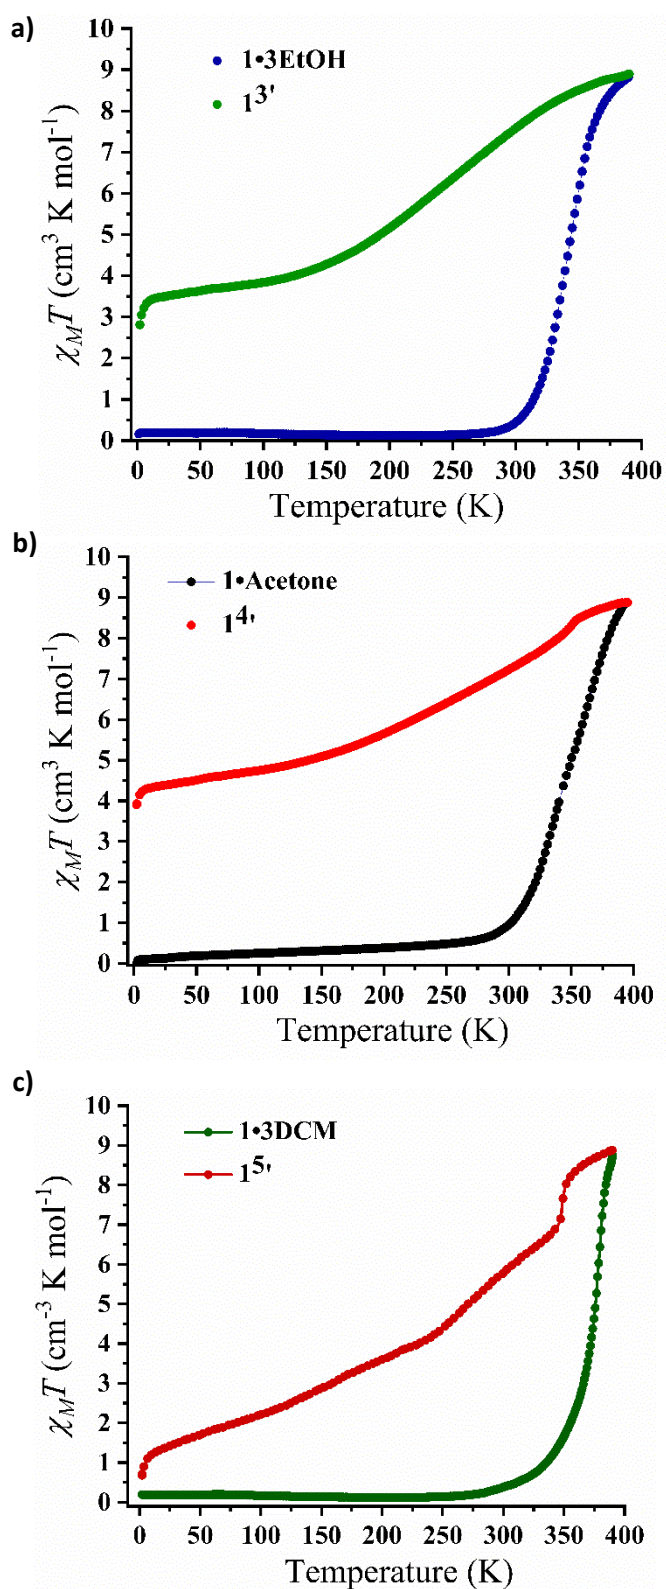

**Figure S5.**  $\chi_M T$  vs T plot for a)  $1 \cdot 3\text{EtOH}$  &  $13'$ , b)  $1 \cdot \text{Acetone}$  &  $14'$  and c)  $1 \cdot 3\text{DCM}$  &  $15'$  between 2 K to 390 K at a scan rate of 6 K/min.

#### 4. Magnetic data fitting:

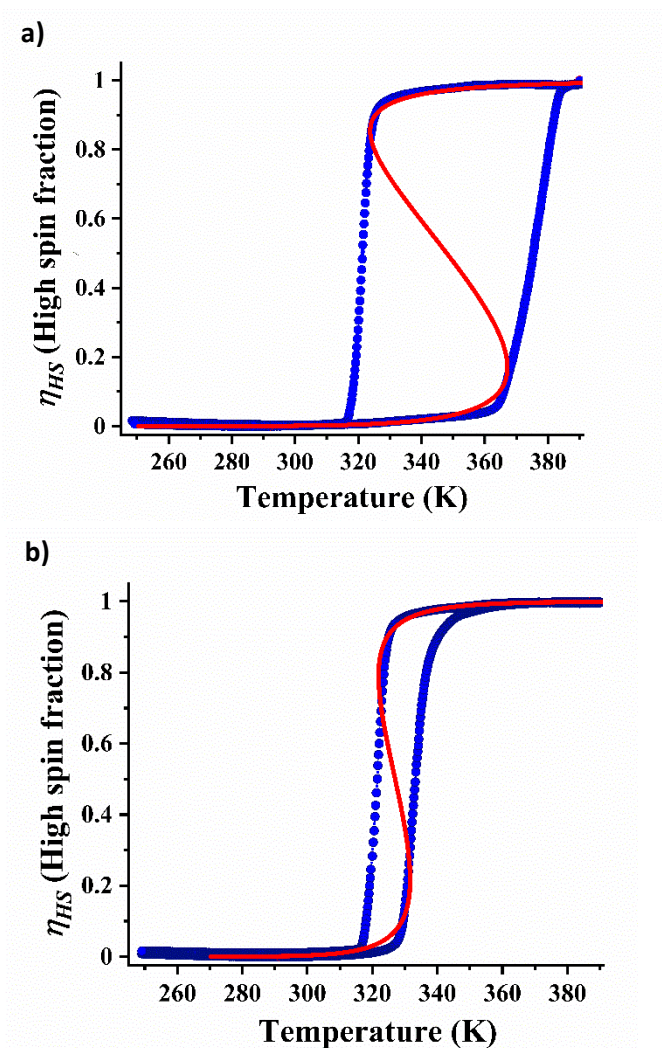

Figure S6.  $\eta_{HS}$  vs T fitting data for a)  $1 \cdot 4H_2O$  and b)  $1''$ .

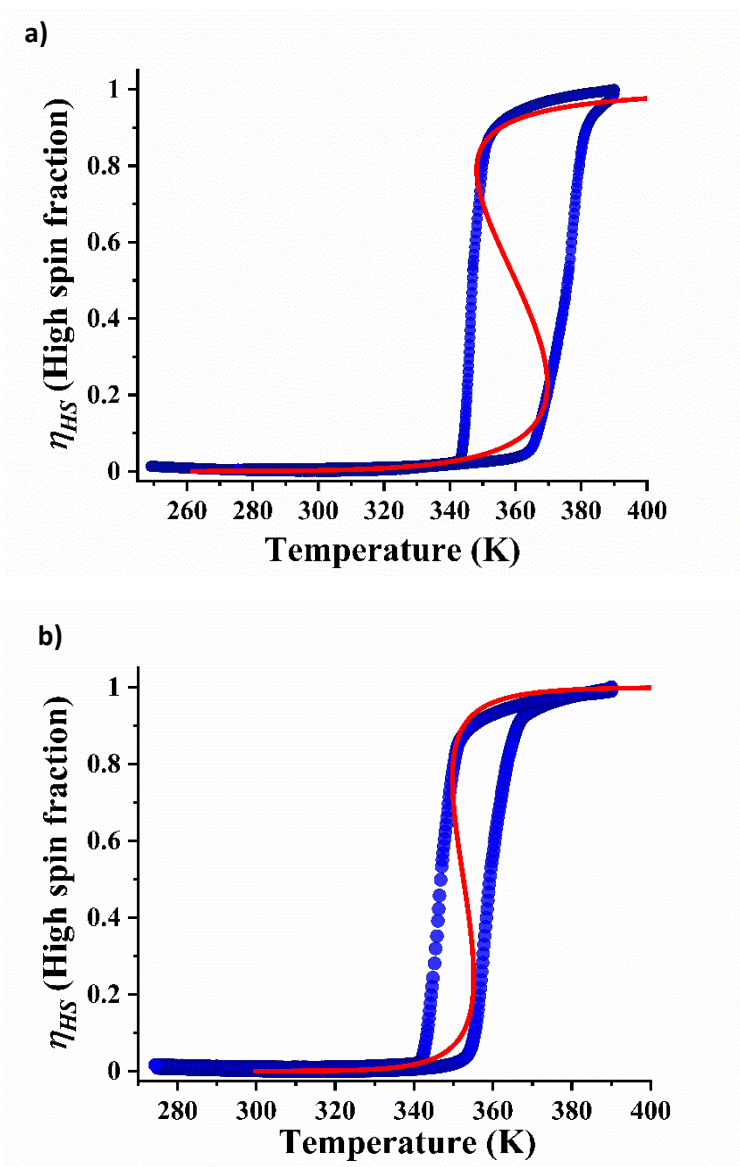

Figure S7.  $\eta_{HS}$  vs T fitting data for a) **1•2MeCN** and b) **1'**.

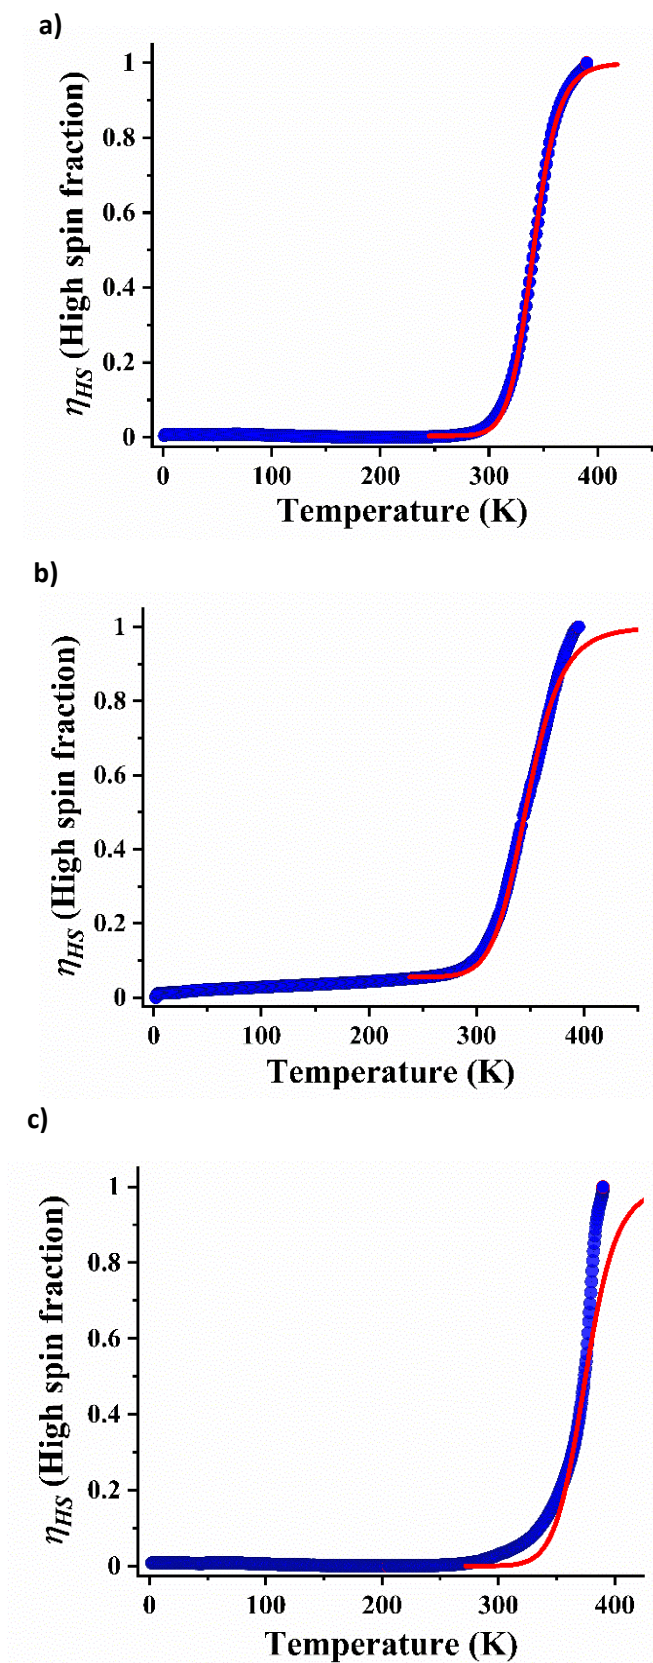

Figure S8.  $\eta_{HS}$  vs T plot for a) **1•3EtOH**, b) **1•Acetone** and c) **1•3DCM**.

**Table S3.** Thermodynamical parameters obtained from the simulation of the experimental  $\chi_{MT}$  vs T curve.

| <b>Complex</b>           | <b><math>\Delta S_{avg}</math> (J/K mol)</b> | <b><math>\Delta H_{avg}</math> (kJ/mol)</b> | <b><math>T_{1/2avg}</math> (K)</b> | <b><math>\Gamma</math> (kJ/mol)</b> | <b><math>\gamma_{HS}^R</math></b> |
|--------------------------|----------------------------------------------|---------------------------------------------|------------------------------------|-------------------------------------|-----------------------------------|
| <b>1•2MeCN</b>           | 102.21                                       | 36.795                                      | 360                                | 8.7                                 | 0                                 |
| <b>1'</b>                | 389.26                                       | 13.702                                      | 352                                | 8                                   | 0                                 |
| <b>1•4H<sub>2</sub>O</b> | 119.28                                       | 41.509                                      | 348                                | 10.8                                | 0                                 |
| <b>1''</b>               | 226.84                                       | 74.177                                      | 327                                | 8.1                                 | 0                                 |
| <b>1•3EtOH</b>           | 244.09                                       | 83.235                                      | 341                                | 0                                   | 0.004                             |
| <b>1•Acetone</b>         | 176.74                                       | 61.329                                      | 347                                | 0                                   | 0.05                              |
| <b>1•3DCM</b>            | 233.21                                       | 87.454                                      | 375                                | 0                                   | 0                                 |

The thermodynamic parameters  $\Delta S$  and  $\Delta H$  calculated from the magnetic data fitting and that from the DSC are in good agreement with the transition temperatures obtained in all the samples (Figure S9, page no. 17-19). For the molecules exhibiting spin transition between HS and LS states, a local strain gets created due to expansion or contraction of the molecular volume. This leads to change in degree of cooperativity between the molecules via intermolecular interactions. Thus, the interaction parameter ( $\Gamma$ ) values gives the explanation of the presence of hysteresis in the complexes where  $\Gamma > 0$ .



## 5. Differential Scanning Calorimetric Study:

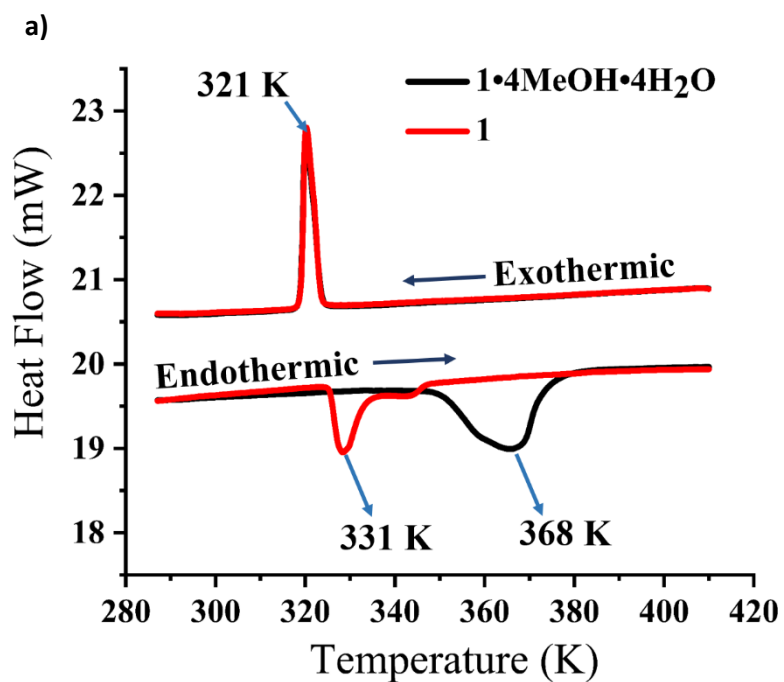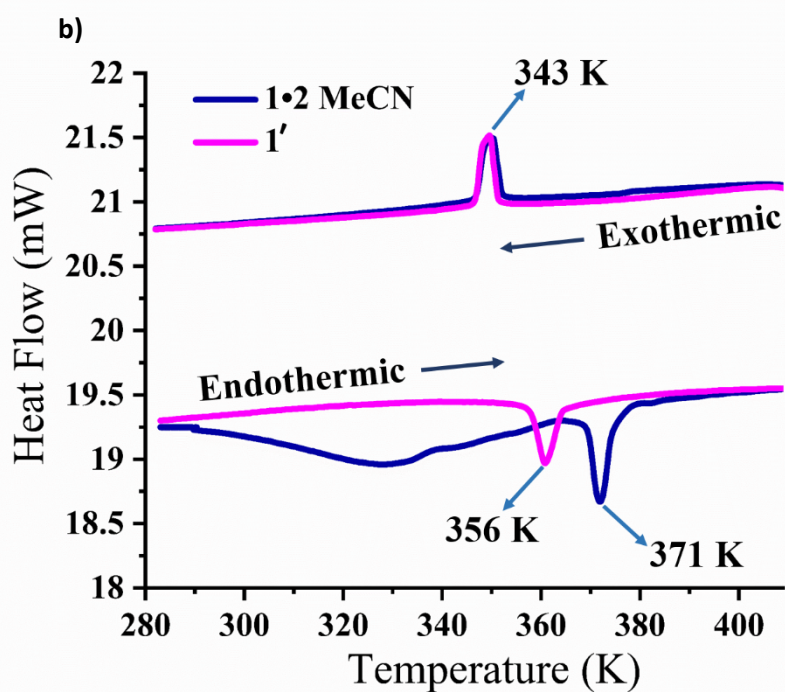

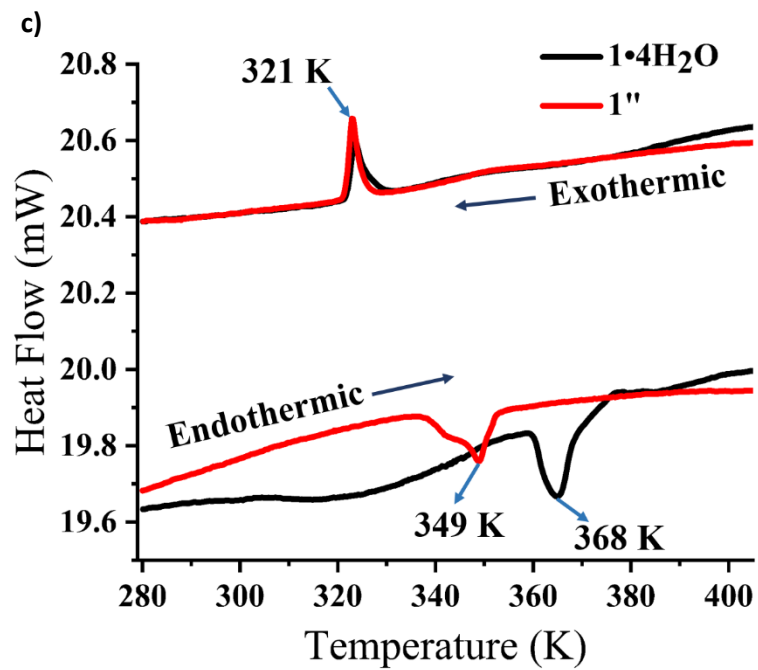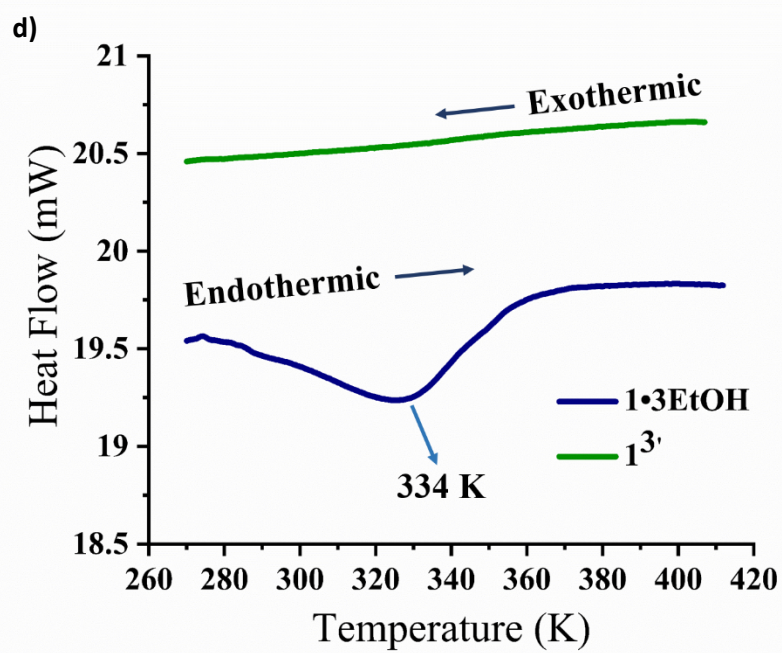

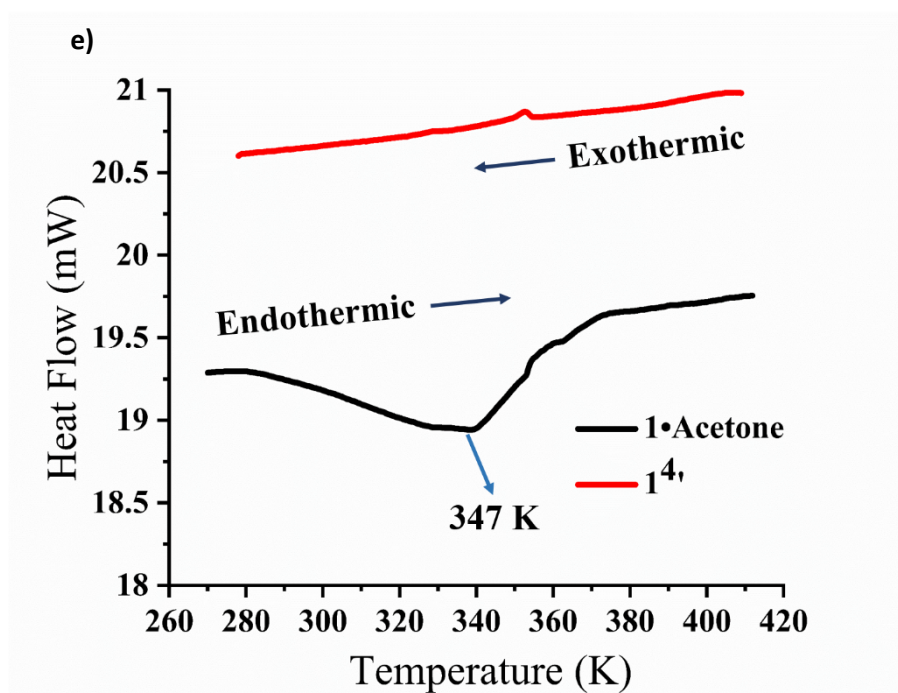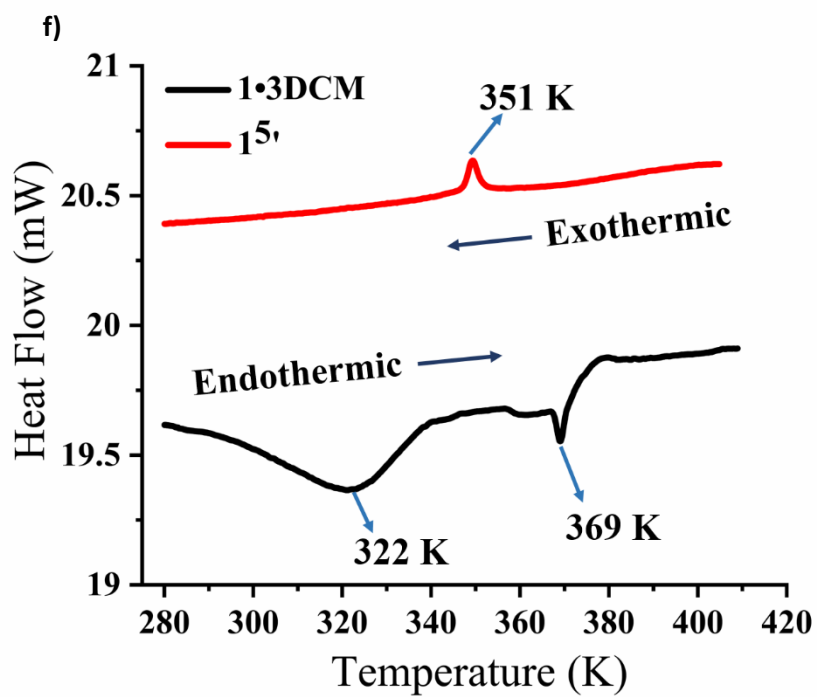

**Figure S9.** DSC data plot for a) **1•4MeOH•4H<sub>2</sub>O** and **1** b) **1•2MeCN** and **1'**, c) **1•4H<sub>2</sub>O** and **1''**, b) **1•3EtOH**, c) **1•Acetone** and d) **1•3DCM** complexes.

## 6. Light Induced Excited Spin State Trapping (LIESST) measurement:

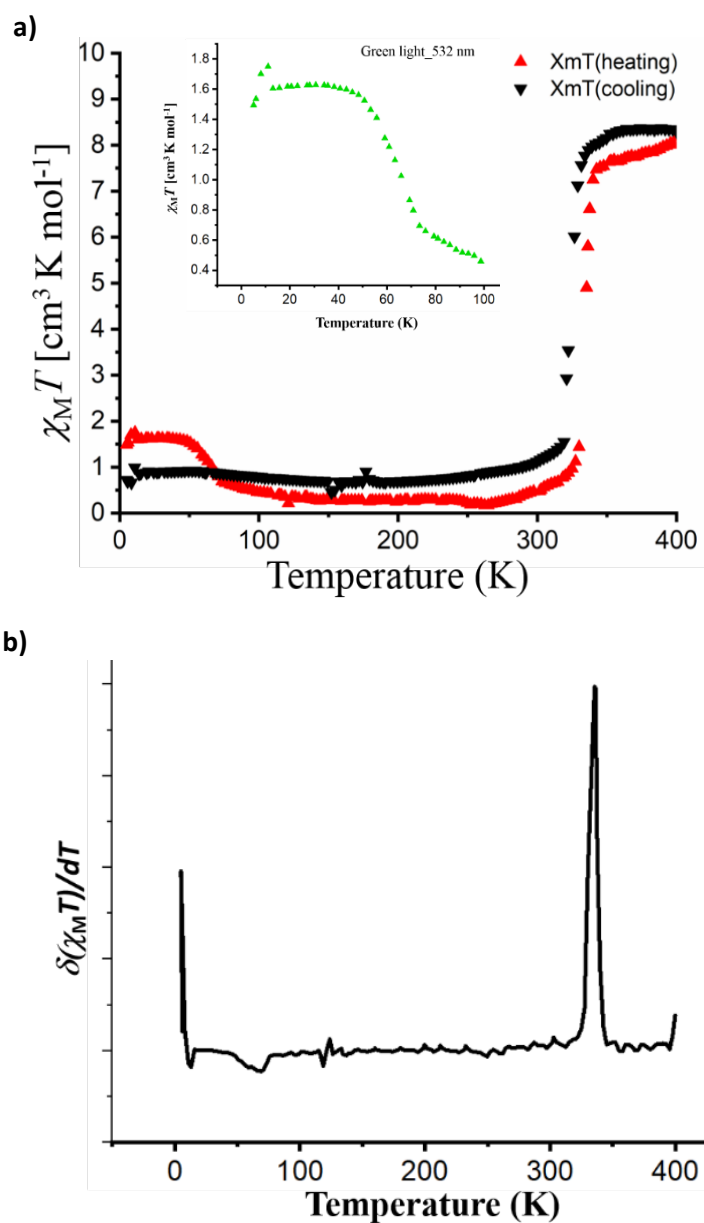

**Figure S10.** a)  $\chi_M T$  vs T plot for 1 with light irradiation at 5 K with 532 nm wavelength followed by temperature sweep up to 400 K (Inset: Enlarged view at low temperature after light irradiation) b) Derivative plot of  $\chi_M T$  vs T plot.

## 7. Thermogravimetric Analysis Study:

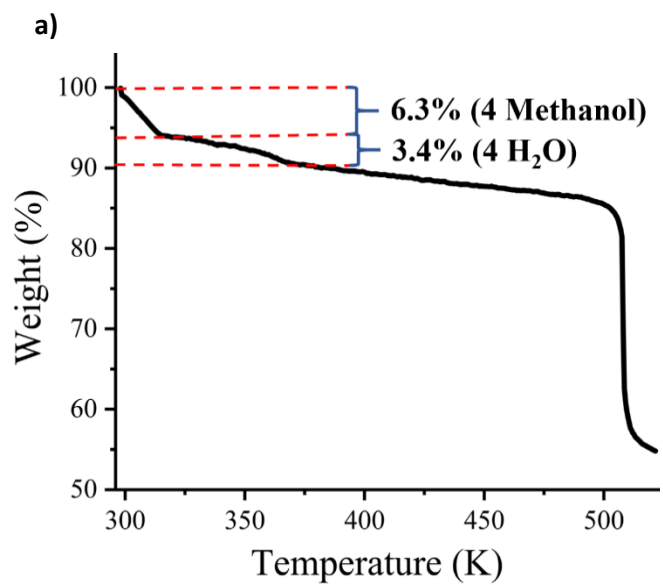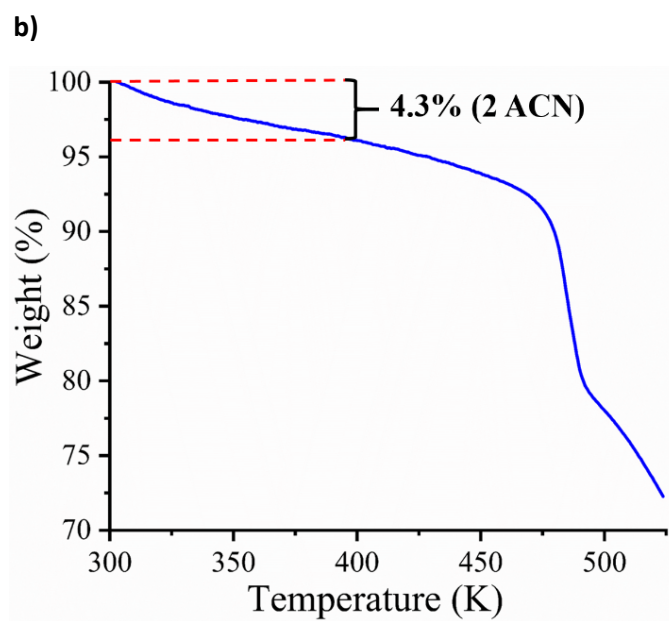

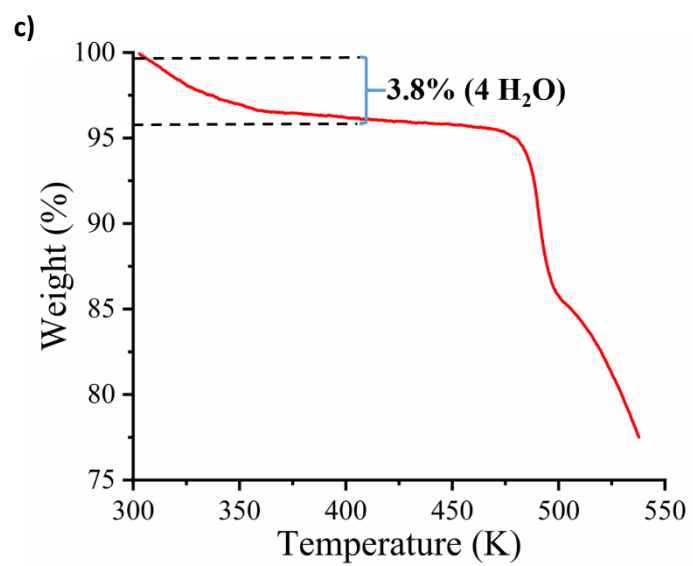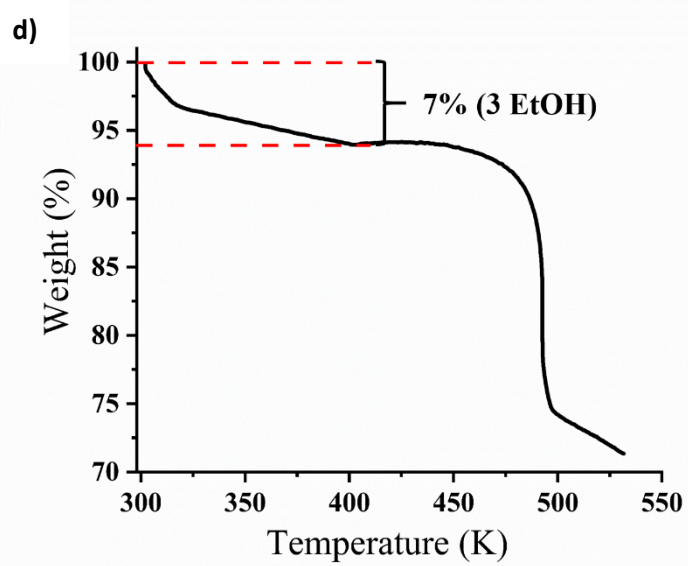

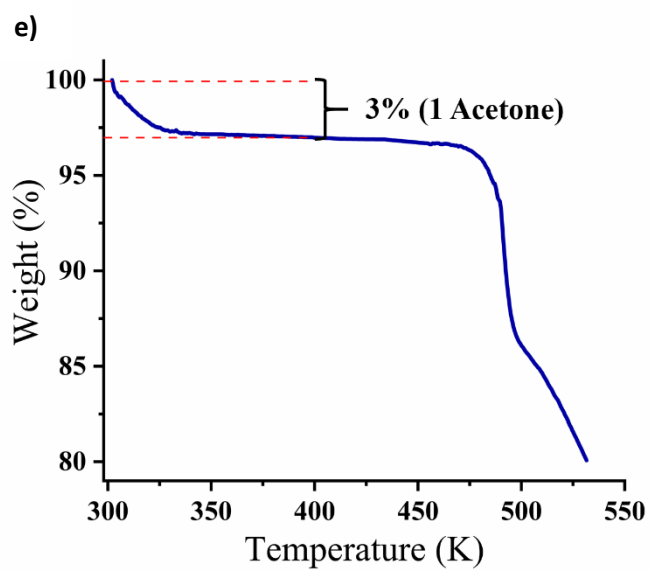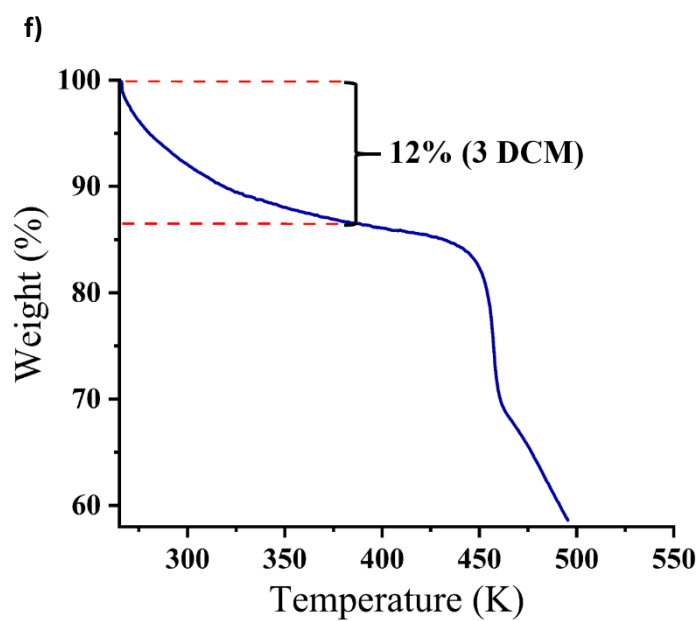

**Figure S11.** TGA data for the complexes a)  $1 \cdot 4\text{MeOH} \cdot 4\text{H}_2\text{O}$ , b)  $1 \cdot 2\text{MeCN}$ , c)  $1 \cdot 4\text{H}_2\text{O}$ , d)  $1 \cdot 3\text{EtOH}$ , e)  $1 \cdot \text{Acetone}$  and f)  $1 \cdot 3\text{DCM}$ .

## 8. FT-Infrared Spectroscopy study:

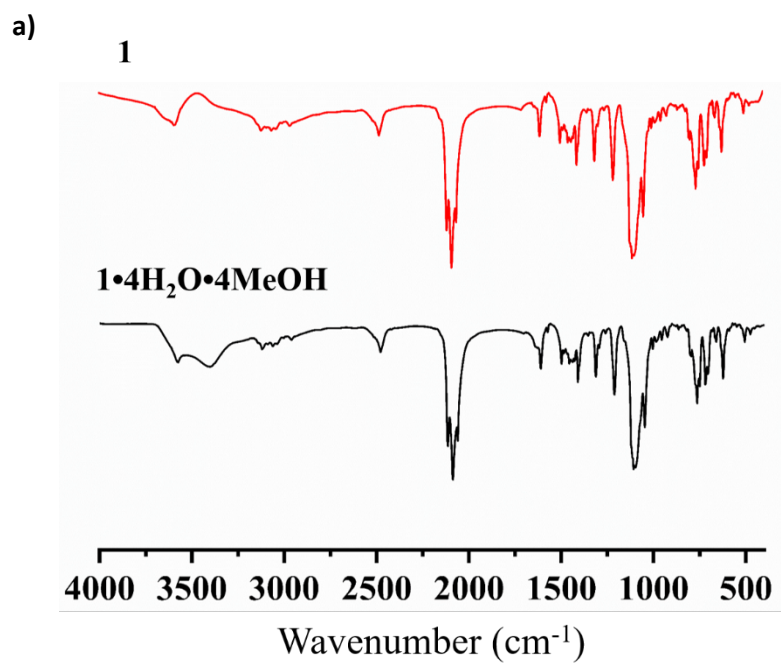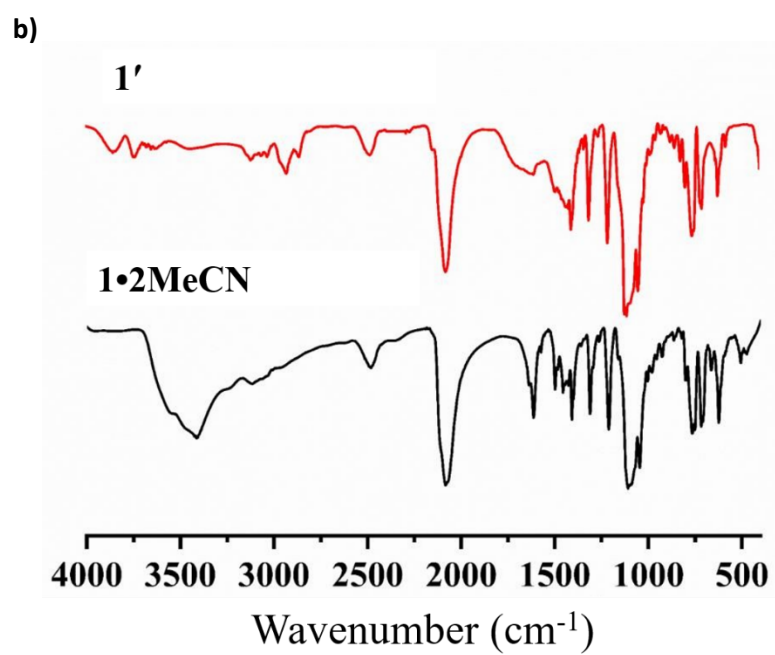



c)

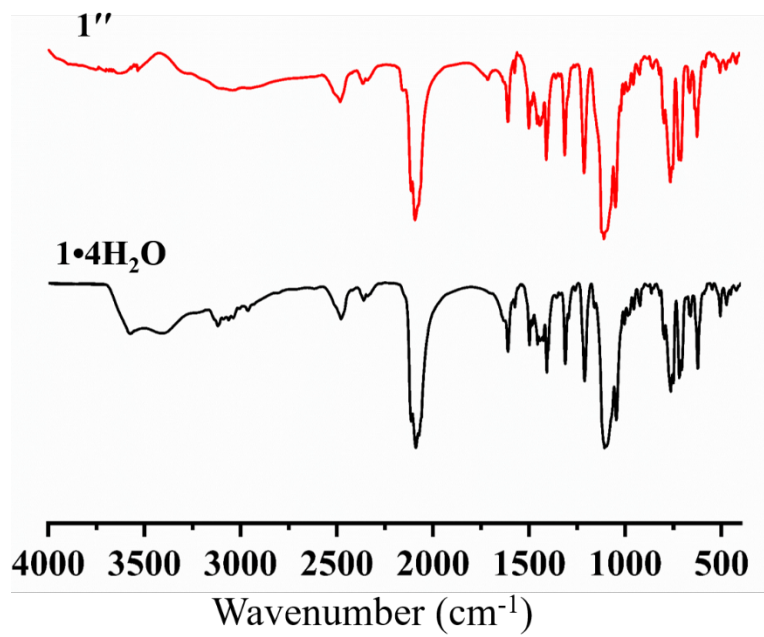

d)

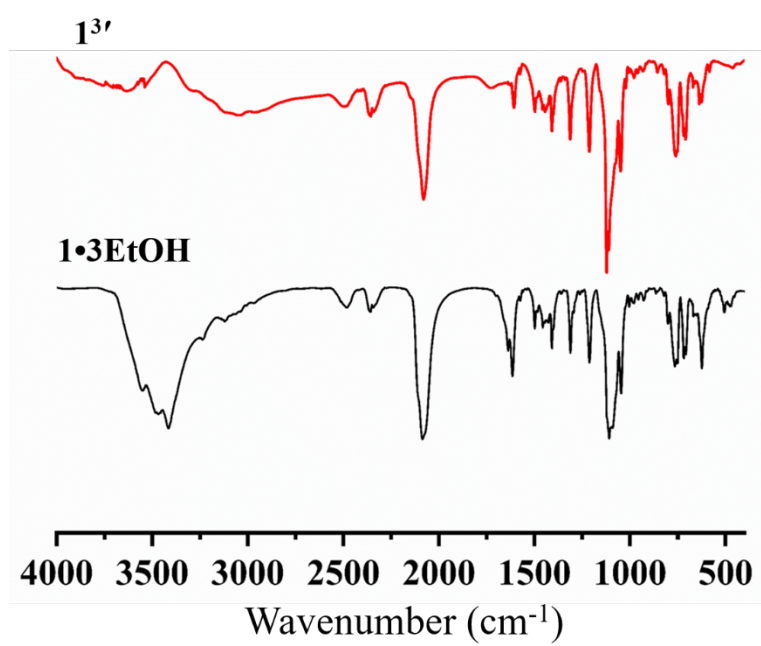

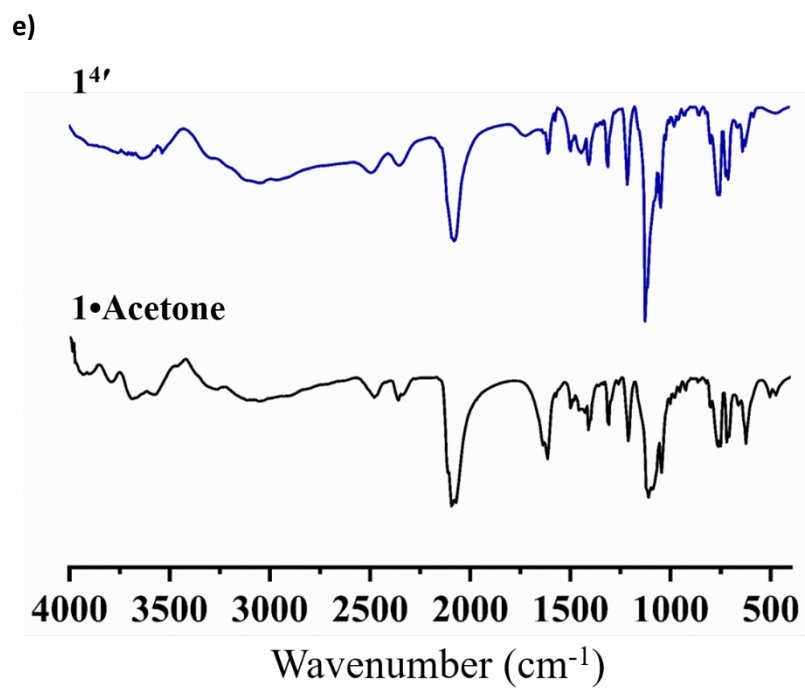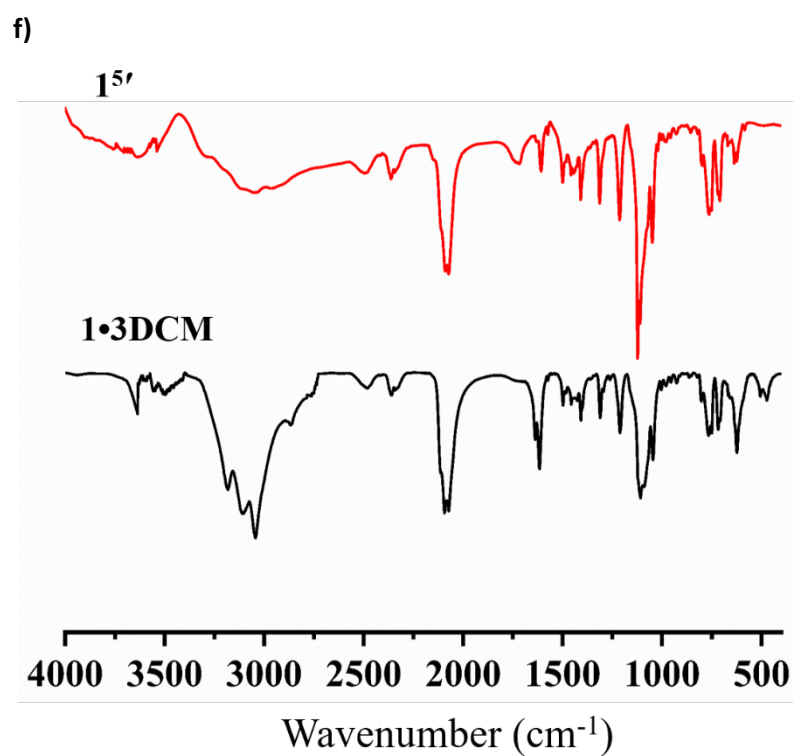

**Figure S12.** FT-IR data for the complexes a) **1•4H<sub>2</sub>O•4MeOH & 1**, b) **1•2MeCN & 1'**, c) **1•4H<sub>2</sub>O & 1''**, d) **1•3EtOH & 1<sup>3'</sup>**, e) **1•Acetone & 1<sup>4'</sup>** and f) **1•3DCM & 1<sup>5'</sup>**.

## 9. Variable Temperature Infrared Spectroscopy:

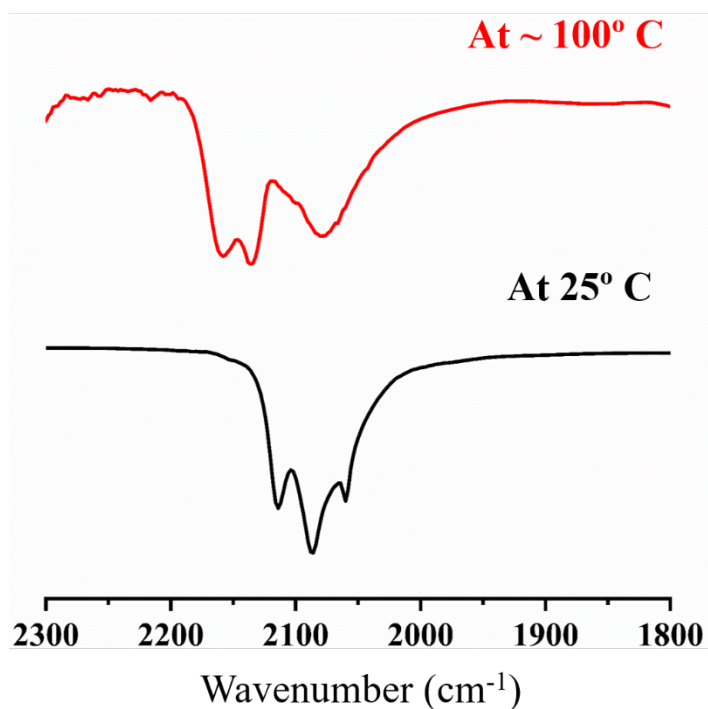

**Figure S13.** Infrared spectroscopy of  $1 \cdot 4\text{MeOH} \cdot 4\text{H}_2\text{O}$  at Room temperature (25°C) and at ~100°C.

At 25°C, the IR spectrum shows peaks at 2116, 2087 and 2059  $\text{cm}^{-1}$  corresponding to  $\text{Fe}^{\text{II}}\text{-CN-Co}^{\text{III}}$ ,  $\text{Fe}^{\text{II}}\text{-CN}$  asymmetric and symmetric stretching frequency respectively. Upon heating the sample at about 100°C, the IR data shows appearance of two new bands at 2158 and 2134  $\text{cm}^{-1}$  representing  $\text{Fe}^{\text{III}}\text{-CN-Co}^{\text{II}}$  and  $\text{Fe}^{\text{III}}\text{-CN}$  respectively.<sup>4</sup> While the peaks present at room temperature, although unresolved were also present in almost 50% ratio. This may be due to non-availability of the space for free expansion of complex compressed in KBr pellet.

## 10. Cyclic Voltammetry Study:

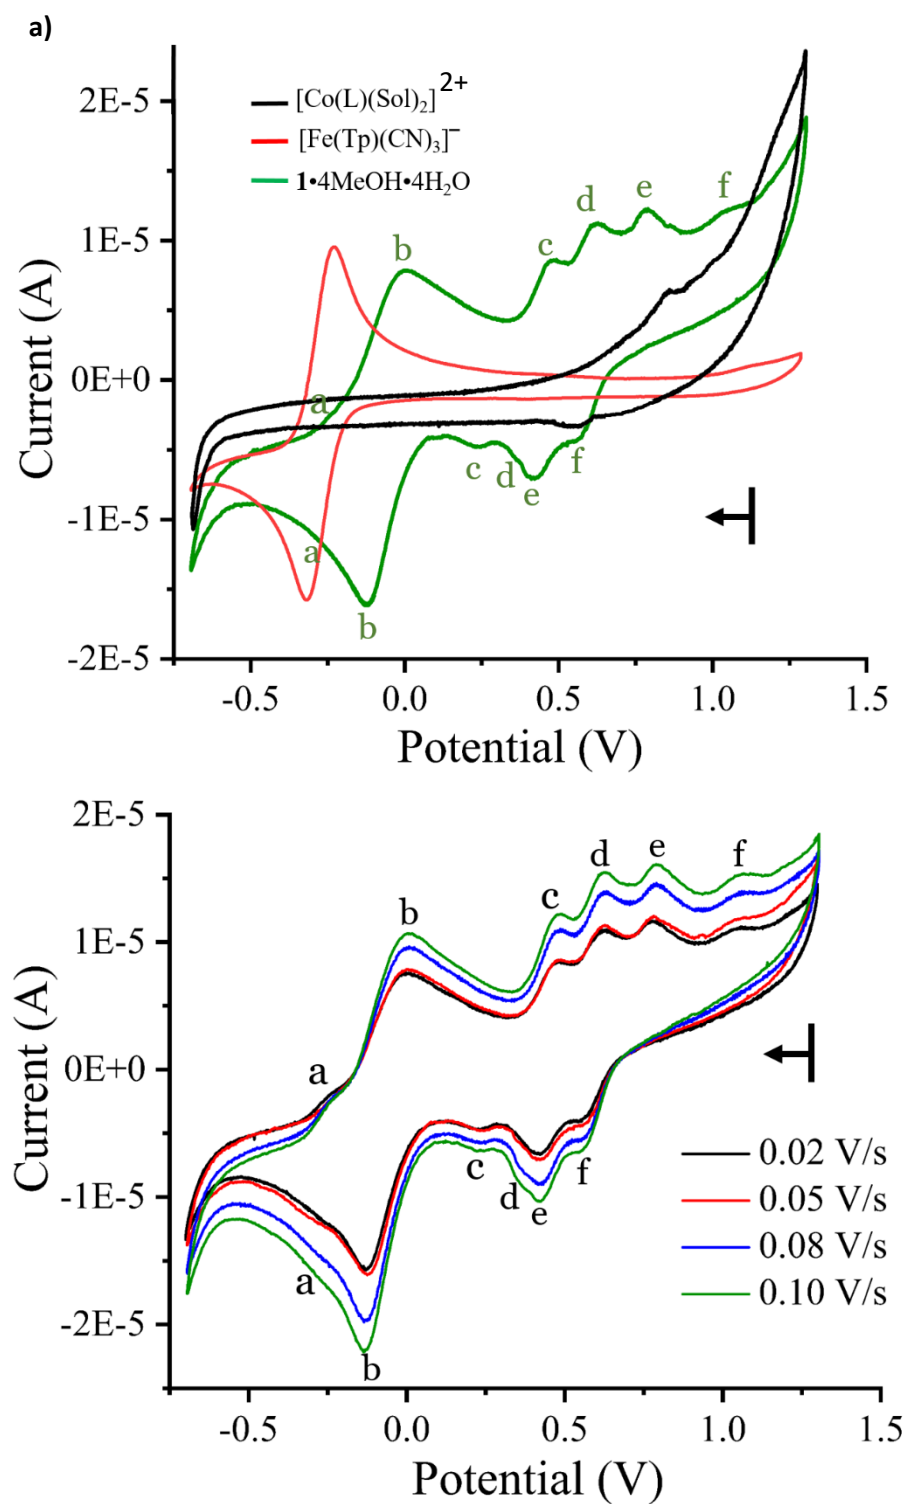

**Figure S14.** Cyclic Voltammetry of a)  $1 \cdot 4\text{MeOH} \cdot 4\text{H}_2\text{O}$  and its component metal complexes and b)  $1 \cdot 4\text{MeOH} \cdot 4\text{H}_2\text{O}$  at different scan rates.<sup>5,6</sup> The arrow represents the direction of sweeping of potential.

The cyclic voltammogram of Na[Fe(Tp)(CN)<sub>3</sub>] displays a reversible redox peak at -0.30 V and -0.21 V vs Fc/Fc<sup>+</sup> corresponding to reduction and oxidation around Fe(III) center (Fe<sup>III/II</sup> and Fe<sup>II/III</sup>), respectively. Complex [Co(L)(sol)<sub>2</sub>]<sup>2+</sup> gives a quasi-reversible peak at 0.65 V and 0.82 V vs Fc/Fc<sup>+</sup> showing reduction and oxidation at Co<sup>II</sup> center (Co<sup>II/I</sup> and Co<sup>I/II</sup>) respectively. A multiple approach for obtaining a good quality cyclic voltammetry for the Co-complex was unsuccessful. These may be because of instability of the complex in the solvent medium. For **1**•4MeOH•4H<sub>2</sub>O, since it is present in [Fe<sup>II</sup><sub>LS2</sub>Co<sup>III</sup><sub>LS2</sub>] state in solution phase at 298 K, the two merged peaks ranging between 0 V and below (negative potential) are ascribed as the two step oxidation of Fe<sup>II</sup> center represented as [Fe<sup>II</sup><sub>2</sub>Co<sup>III</sup><sub>2</sub>]/[Fe<sup>III</sup>Fe<sup>II</sup>Co<sup>III</sup><sub>2</sub>] and [Fe<sup>III</sup>Fe<sup>II</sup>Co<sup>III</sup><sub>2</sub>]/[Fe<sup>III</sup><sub>2</sub>Co<sup>III</sup><sub>2</sub>]. While the four merged quasi-reversible peaks ranging from 0.3 V to 1.05 V corresponds to partial stepwise reduction of Co<sup>III</sup> center depicted as ([Fe<sup>III</sup><sub>2</sub>Co<sup>II</sup><sub>2</sub>]/[Fe<sup>III</sup><sub>2</sub>Co<sup>III</sup>Co<sup>II</sup>]) and [Fe<sup>III</sup><sub>2</sub>Co<sup>III</sup>Co<sup>II</sup>]/[Fe<sup>III</sup><sub>2</sub>Co<sup>III</sup><sub>2</sub>].<sup>5</sup>

The peak differences between the Fe- and Co- precursor complexes and that of the complex **1**•4MeOH•4H<sub>2</sub>O in the control experiment (Figure S14a) shows that, the peaks present in the CV of **1**•4MeOH•4H<sub>2</sub>O is for the two sub-components bridged by the cyanide units forming the square complex. It is expected that the system is stable in the solvent medium.

## 11. UV-Visible Spectroscopy:

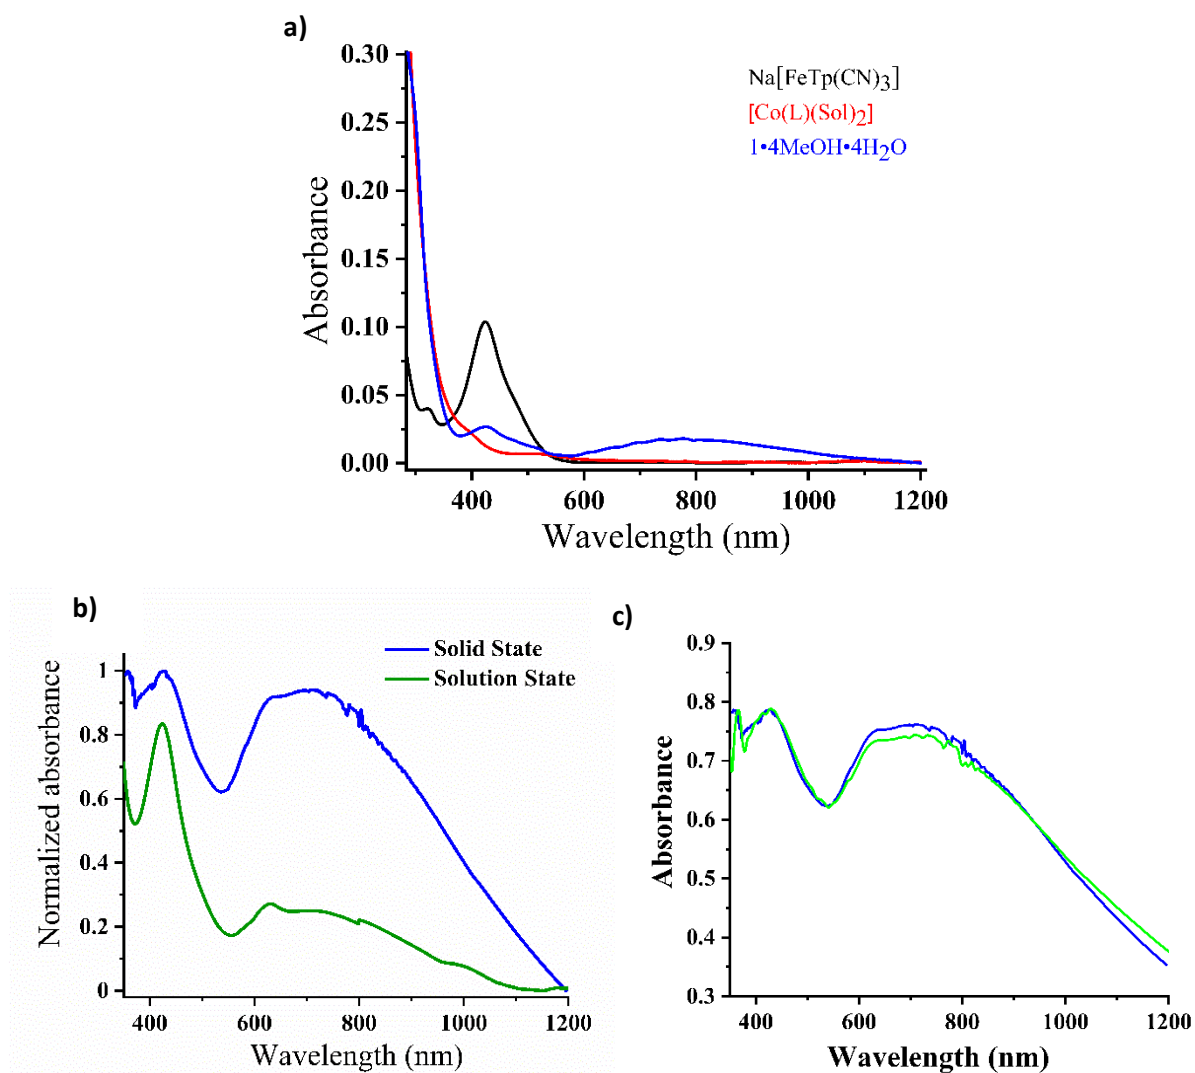

**Figure S15.** a) Solution state UV-Visible spectroscopy of  $1 \cdot 4\text{MeOH} \cdot 4\text{H}_2\text{O}$  and its component metal complexes, b) Solution state (green) and solid state (blue) UV-visible spectroscopy for  $1 \cdot 4\text{MeOH} \cdot 4\text{H}_2\text{O}$  and c) Solid state UV-visible spectroscopy for  $1 \cdot 4\text{MeOH} \cdot 4\text{H}_2\text{O}$  (blue) and  $1$  (green).<sup>5,7-8</sup>

The stability of the complex in solution as well as solid phase is well supported by the similar solid and solution phase UV-Visible spectroscopic data. (Figure S15b)

## References:

- 1 J. Kim, S. Han, I.-K. Cho, K. Y. Choi, M. Heu, S. Yoon and B. J. Suh, *Polyhedron* 2004, **23**, 1333-1339.
- 2 C. Ng, M. Sabat and C. L. Fraser, *Inorg. Chem.* 1999, **38**, 5545-5556.
- 3 (a) C. P. Slichter and H. G. Drickamer, *J. Chem. Phys.* 1972, **56**, 2142-2160; (b) W. Nicolazzi and A. Bousseksou, *C. R. Chimie* 2018, **21**, 1060-1074.
- 4 S. De, J.-R. Jiménez, Y. Li, L.-M. Chamoreau, A. Flambard, Y. Journaux, A. Bousseksou and R. Lescouëzec, *RSC Advances* 2016, **6**, 17456-17459.
- 5 M. Nihei, Y. Sekine, N. Suganami, K. Nakazawa, A. Nakao, H. Nakao, Y. Murakami and H. Oshio, *J. Am. Chem. Soc.* 2011, **133**, 3592-3600.
- 6 A. Kumar, S. S., P. Varshney, A. Paul and S. Jeyaraman, *Dalton Trans.* 2019, **48**, 11345-11351.
- 7 Y.-Z. Zhang, P. Ferko, D. Siretanu, R. Ababei, N. P. Rath, M. J. Shaw, R. Clérac, C. Mathonier and S. M. Holmes, *J. Am. Chem. Soc.* 2014, **136**, 16854-16864.
- 8 J. Mercuriol, Y. Li, E. Pardo, O. Risset, M. Seuleiman, H. Rousselière, R. Lescouëzec and M. Julve, *Chem. Commun.* 2010, **46**, 8995-8997.
